# Supplementary material for: Single vs. multiple fraction non-inferiority trial of stereotactic ablative radiotherapy for the comprehensive treatment of oligo-metastases/progression: SIMPLIFY-SABR-COMET
Source: BMC Cancer. 2024 Feb 3;24:171. doi: 10.1186/s12885-024-11905-7 (PMC10838428; doi:10.1186/s12885-024-11905-7)
Supplement: Supplementary file 1 — Additional file 1: Appendix 1. BC CANCER PROVINCIAL SABR ORGAN-AT-RISK (OAR) CONSTRAINTS. Appendix 2. Reasonable reirradiation SBRT doses to the thecal sac Pmax following common initial conventional radiotherapy regimens. [file 12885_2024_11905_MOESM1_ESM.docx]

## Appendix 1: BC CANCER PROVINCIAL SABR ORGAN-AT-RISK (OAR) CONSTRAINTS

| **OAR** | **SABR ORGAN-AT-RISK (OAR) CONSTRAINTS**  Dmax ≤=0.035cc for all OARs Starred (*) Values are EQD2 equivalent dose conversion from stated reference | | | | | |
| --- | --- | --- | --- | --- | --- | --- |
| **Fractions** | | | | | |
| **1** | **2** | **3** | **4** | **5** | **8** |

| **Spinal Cord PRV  (2mm on cord)**  **(or Spinal Canal)** | Dmax ≤ 14 Gy24,25 | Dmax ≤ 19.3 Gy25 | Dmax ≤ 23.1 Gy25 | Dmax ≤ 26.2 Gy25 | Dmax ≤ 28.8 Gy25 | Dmax ≤ 35 Gy13 |
| --- | --- | --- | --- | --- | --- | --- |
| ***EQD2/2*** | ***Dmax ≤ 56 Gy*** | ***Dmax ≤ 56 Gy*** | ***Dmax ≤ 56 Gy*** | ***Dmax ≤ 56 Gy*** | ***Dmax ≤ 56 Gy*** | ***Dmax ≤ 56 Gy*** |
| **Spinal Cord PRV /Thecal Sac** (reirradiation) | Refer to: Sahgal A, et al., IJROBP, 82(1):107-116, 2012. DOI: (10.1016/j.ijrobp.2010.08.021) 11 | | | | | |
| ***EQD2/2*** | ***Total EQD2/2 ( previous RT + SBRT, no recovery included ) ≤ 70Gy*** | | | | | |
| **Cauda equina (Thecal Sac)** | Dmax ≤ 16.0 Gy1  V14Gy ≤ 5cc Gy1 | Dmax ≤ 20 Gy1*  V18.5Gy ≤ 5cc1* | Dmax ≤ 24 Gy1  V21.9Gy ≤ 5 cc1 | Dmax ≤ 29 Gy 1*  V27Gy ≤ 5 cc1* | Dmax ≤ 32 Gy1  V30Gy ≤ 5 cc1 | Dmax ≤ 39 Gy1*  V36Gy ≤ 5 cc1* |
| ***EQD2/2*** | ***Dmax ≤ 72 Gy***  ***V56Gy ≤ 5cc*** | ***Dmax ≤ 60 Gy***  ***V52Gy ≤ 5cc*** | ***Dmax ≤ 60 Gy***  ***V50Gy ≤ 5cc*** | ***Dmax ≤ 67 Gy***  ***V60Gy ≤ 5cc*** | ***Dmax ≤ 67 Gy***  ***V60Gy ≤ 5cc*** | ***Dmax ≤ 67 Gy***  ***V60Gy ≤ 5cc*** |
| **Sacral plexus** | Dmax ≤ 16 Gy1  V14.4Gy ≤ 5cc1 | Dmax ≤ 21 Gy1* (Dmax ≤ 26Gy12)  V20Gy ≤ 5cc1* | Dmax ≤ 24 Gy1  V22.5 Gy ≤ 5 cc1 | Dmax ≤ 29 Gy 1*  V27 Gy ≤ 5 cc1* | Dmax ≤ 32 Gy1  V30 Gy ≤ 5 cc1 | Dmax ≤ 39 Gy1*  V36 Gy ≤ 5 cc1* |
| ***EQD2/2*** | ***Dmax ≤ 72 Gy***  ***V59Gy ≤ 5cc*** | ***Dmax ≤ 66 Gy***  ***(Dmax ≤ 97 Gy)***  ***V60Gy ≤ 5cc*** | ***Dmax ≤ 60 Gy***  ***V53Gy ≤ 5cc*** | ***Dmax ≤ 67 Gy***  ***V60Gy ≤ 5cc*** | ***Dmax ≤ 67 Gy***  ***V60Gy ≤ 5cc*** | ***Dmax ≤ 67 Gy***  ***V60Gy ≤ 5cc*** |
| **Brachial Plexus** | Dmax ≤ 17.5 Gy3  V14Gy ≤ 3cc3 | Dmax ≤ 22 Gy24*  V18.5Gy ≤ 3cc24* | Dmax ≤ 24 Gy 1  V20.4Gy ≤ 3cc1 | Dmax ≤ 26 Gy 4  V23.6Gy ≤ 3 cc 3 | Dmax ≤ 30.5 Gy 1  V27Gy ≤ 3 cc1 | Dmax ≤ 35 Gy 4 |
| ***EQD2/2*** | ***Dmax ≤ 85 Gy***    ***V56Gy ≤ 3cc*** | ***Dmax ≤ 72 Gy***    ***V52Gy ≤ 3cc*** | ***Dmax ≤ 60 Gy***  ***V45Gy ≤ 3cc*** | ***Dmax ≤ 55 Gy***  ***V47Gy ≤ 3cc*** | ***Dmax ≤ 62 Gy***  ***V50Gy ≤ 3cc*** | ***Dmax ≤ 56 Gy*** |
| **Heart / Pericardium** | Dmax ≤ 22 Gy1 V16Gy ≤ 15cc1 | Dmax ≤ 25 Gy1*  V21Gy ≤ 15cc1* | Dmax ≤ 30 Gy1  V24Gy ≤ 15 cc1 | Dmax ≤ 34 Gy 3  V28Gy ≤ 15 cc 3 | Dmax ≤ 38 Gy1  V32Gy ≤ 15 cc1 | Dmax ≤ 46 Gy 2  V39Gy ≤ 15 cc 2 |
| ***EQD2/3*** | ***Dmax ≤ 110 Gy***  ***V61Gy ≤ 15cc*** | ***Dmax ≤ 78 Gy***  ***V57Gy ≤ 15cc*** | ***Dmax ≤ 78 Gy***  ***V53Gy ≤ 15 cc*** | ***Dmax ≤ 78 Gy***  ***V56Gy ≤ 15 cc*** | ***Dmax ≤ 81 Gy***  ***V60Gy ≤ 15 cc*** | ***Dmax ≤ 81 Gy***  ***V61Gy ≤ 15 cc*** |
| **Great Vessels (excl. Pulmonary Artery)** | Dmax ≤ 37 Gy3  V31Gy ≤ 10cc3 | Dmax ≤ 40 Gy20 | Dmax ≤ 44 Gy20 | Dmax ≤ 49.0 Gy20 | Dmax ≤ 51.5 Gy20 | Dmax ≤ 65 Gy |
| ***EQD2/3*** | ***Dmax ≤ 296 Gy***  ***V210Gy ≤ 10cc*** | ***Dmax ≤ 184 Gy*** | ***Dmax ≤ 156 Gy*** | ***Dmax ≤ 150 Gy*** | ***Dmax ≤ 137 Gy*** | ***Dmax ≤ 145 Gy*** |
| **Pulmonary Artery** | Dmax ≤ 25 Gy20* | Dmax ≤ 35 Gy20* | Dmax ≤ 42 Gy20* | Dmax ≤ 48 Gy20* | Dmax ≤ 51.5 Gy20 | Dmax ≤ 65 Gy20* |
| ***EQD2/3*** | ***Dmax ≤ 140 Gy*** | ***Dmax ≤ 143 Gy*** | ***Dmax ≤ 143 Gy*** | ***Dmax ≤ 144 Gy*** | ***Dmax ≤ 137 Gy*** | ***Dmax ≤ 145 Gy*** |
| **OAR** | **1** | **2** | **3** | **4** | **5** | **8** |
| **Carotid**  **Artery** | Dmax ≤ 21 Gy28* | Dmax ≤ 29 Gy28* | Dmax ≤ 35 Gy28* | Dmax ≤ 40 Gy28* | Dmax ≤ 44 Gy28 | Dmax ≤ 54 Gy28* |
| ***EQD2/3*** | ***Dmax ≤ 101 Gy*** | ***Dmax ≤ 102 Gy*** | ***Dmax ≤ 103 Gy*** | ***Dmax ≤ 104 Gy*** | ***Dmax ≤ 104 Gy*** | ***Dmax ≤ 105 Gy*** |
| **Larynx**  **(extension of trachea)**  **(Priority per MRP)** | Dmax ≤ 20.2 Gy1,3** | Dmax ≤ 25 Gy1* | Dmax ≤ 30 Gy 1* | Dmax ≤ 34.8 Gy3 | Dmax ≤ 40 Gy1* | Dmax ≤ 46.3 Gy1* |
| ***EQD2/3*** | ***Dmax ≤ 94 Gy*** | ***Dmax ≤ 78 Gy*** | ***Dmax ≤ 78 Gy*** | ***Dmax ≤ 81 Gy*** | ***Dmax ≤ 88 Gy*** | ***Dmax ≤ 81 Gy*** |
| **PBT and PT  (proximal bronch tree & proximal trachea)** | Dmax ≤ 20.2 Gy1,3 | Dmax ≤ 25 Gy1* | Dmax ≤ 30 Gy 1 | Dmax ≤ 34.8 Gy3 | Dmax ≤ 40 Gy1 | Dmax ≤ 46.3 Gy3* |
| ***EQD2/3*** | ***Dmax ≤ 94 Gy*** | ***Dmax ≤ 78 Gy*** | ***Dmax ≤ 78 Gy*** | ***Dmax ≤ 81 Gy*** | ***Dmax ≤ 88 Gy*** | ***Dmax ≤ 81 Gy*** |
| **Pharynx**  **(extension of esophagus)**  **(Priority per MRP)** | Dmax ≤ 15.4 Gy1* | Dmax ≤ 21 Gy1* | Dmax ≤ 27.0 Gy21* | Dmax ≤ 30 Gy 3, 21* | Dmax ≤ 35 Gy1*, 21* | Dmax ≤ 40 Gy 2* |
| ***EQD2/3*** | ***Dmax ≤ 57 Gy*** | ***Dmax ≤ 57 Gy*** | ***Dmax ≤ 65 Gy*** | ***Dmax ≤ 63 Gy*** | ***Dmax ≤ 70 Gy*** | ***Dmax ≤ 64 Gy*** |
| **Esophagus** | Dmax ≤ 15.4 Gy1 | Dmax ≤ 21 Gy1* | Dmax ≤ 27.0 Gy21 | Dmax ≤ 30 Gy 3, 21 | Dmax ≤ 35 Gy1, 21 | Dmax ≤ 40 Gy 2 |
| ***EQD2/3*** | ***Dmax ≤ 57 Gy*** | ***Dmax ≤ 57 Gy*** | ***Dmax ≤ 65 Gy*** | ***Dmax ≤ 63 Gy*** | ***Dmax ≤ 70 Gy*** | ***Dmax ≤ 64 Gy*** |
| **Lungs-GTV** | >1500cc ≤ 7 Gy1,3  V11Gy ≤10%8*, 26  Mean ≤ 4.8 Gy27* | >1500cc≤ 9.5 Gy1*  V15 Gy ≤10%3*,8*  Mean ≤ 6.1 Gy27* | >1500cc ≤ 10.5 Gy31  V18 Gy ≤10%3*,8*  Mean ≤ 7.0 Gy27* | >1500cc≤11.6 Gy3  V20 Gy ≤ 10%3,8*  Mean ≤ 7.6 Gy27* | >1500cc ≤12.5Gy1  V22 Gy ≤ 10%3*,8*  Mean ≤ 8.0 Gy27 | > 1500c ≤ 14 Gy3*  V26Gy ≤ 10%3*,8*  Mean ≤ 9.0 Gy27* |
| ***EQD2/3*** | ***>1500cc ≤ 14 Gy***  ***V31Gy ≤10%***  ***Mean ≤ 7.5 Gy*** | ***>1500cc ≤ 15 Gy***  ***V32Gy ≤10%***  ***Mean ≤ 7.4 Gy*** | ***>1500cc ≤ 14 Gy***  ***V32Gy ≤10%***  ***Mean ≤ 7.5 Gy*** | ***>1500cc ≤ 14 Gy***  ***V32Gy ≤10%***  ***Mean ≤ 7.4 Gy*** | ***>1500cc ≤ 14 Gy***  ***V33Gy ≤10%***  ***Mean < 7.4 Gy*** | ***>1500cc ≤ 13 Gy***  ***V33Gy ≤10%***  ***Mean < 7.4 Gy*** |
| **Chest wall and Ribs:** | Dmax ≤ 26 Gy7*  V18Gy ≤ 30cc6* | Dmax ≤ 36.5 Gy7*  V25Gy ≤ 30cc6* | Dmax ≤ 44 Gy 7  V30 Gy ≤ 30 cc6 | Dmax≤ 50 Gy 7  V34 Gy ≤ 30 cc6 | Dmax ≤ 55Gy 7  V37 Gy ≤ 30cc6 | Dmax ≤68 Gy7  V45 Gy ≤ 30 cc6 |
| ***EQD2/3*** | ***Dmax ≤ 151 Gy***  ***V76Gy ≤ 30cc*** | ***Dmax ≤ 155 Gy***  ***V78Gy ≤ 30cc*** | ***Dmax ≤ 155 Gy***  ***V78Gy ≤ 30cc*** | ***Dmax ≤ 155 Gy***  ***V78Gy ≤ 30cc*** | ***Dmax ≤ 154 Gy***  ***V77Gy ≤ 30cc*** | ***Dmax ≤ 156 Gy***  ***V78Gy ≤ 30cc*** |
| **Skin** | Dmax ≤ 21.7Gy24  V20.3Gy ≤ 10cc24 | Dmax ≤ 26 Gy1*  V24 Gy ≤ 10 cc1* | Dmax ≤ 33 Gy1  V30Gy ≤ 10 cc1 | Dmax ≤ 36 Gy 3  V33.2 Gy ≤ 10 cc 3 | Dmax ≤ 39.5 Gy1  V36.5 Gy ≤ 10 cc1 | Dmax ≤ 48 Gy3*  V44 Gy ≤ 10 cc3* |
| ***EQD2/3*** | ***Dmax ≤ 107 Gy***  ***V95Gy ≤ 10cc*** | ***Dmax ≤ 83 Gy***  ***V72 Gy ≤ 10 cc*** | ***Dmax ≤ 92 Gy***  ***V78 Gy ≤ 10 cc*** | ***Dmax ≤ 86 Gy***  ***V75 Gy ≤ 10 cc*** | ***Dmax ≤ 86 Gy***  ***V75 Gy ≤ 10 cc*** | ***Dmax ≤ 86 Gy***  ***V75 Gy ≤ 10 cc*** |
| **Stomach** | Dmax ≤ 16.0 Gy24  V13Gy ≤ 10cc24 | Dmax ≤ 20 Gy12 | Dmax ≤ 22.2 Gy1  (Dmax ≤25 Gy14) | Dmax ≤ 273 Gy | Dmax ≤ 32 Gy1  (Dmax ≤ 35 Gy14) | Dmax ≤ 40 Gy 2 |
| ***EQD2/3*** | ***Dmax ≤ 61 Gy***  ***V42Gy ≤ 10cc*** | ***Dmax ≤ 52 Gy*** | ***Dmax ≤ 46 Gy***  ***(Dmax ≤57 Gy)*** | ***Dmax ≤ 53 Gy*** | ***Dmax ≤ 60 Gy***  ***(Dmax ≤70 Gy)*** | ***Dmax ≤ 64 Gy*** |
| **Duodenum** | Dmax ≤ 12.4Gy1  (Dmax ≤ 17Gy24)  V11.2Gy ≤ 5cc24 | Dmax ≤ 20 Gy12 | Dmax ≤ 22.2 Gy1  (Dmax ≤ 25 Gy14) | Dmax ≤ 29.0 Gy1* | Dmax ≤ 32 Gy1,22  (Dmax ≤ 35 Gy14 ) | Dmax ≤ 39 Gy 2 |
| ***EQD2/3*** | ***Dmax ≤ 38.2 Gy (Dmax ≤ 68 Gy)***  ***V32Gy ≤ 5cc*** | ***Dmax ≤ 52 Gy*** | ***Dmax ≤ 46 Gy***  ***(Dmax ≤ 57 Gy)*** | ***Dmax ≤ 60 Gy*** | ***Dmax ≤ 60 Gy (Dmax ≤ 70 Gy*** | ***Dmax ≤ 61 Gy*** |
| **OAR** | **1** | **2** | **3** | **4** | **5** | **8** |
| **Small Bowel**  **(jejunum / ileum)** | Dmax ≤ 17 Gy1*  V10.2Gy ≤ 5cc1* | Dmax ≤ 20 Gy12 | Dmax ≤ 25.2 Gy1, 23 | Dmax ≤ 28.5 Gy23 | Dmax ≤ 29.0 Gy23  (Dmax ≤ 35 Gy1 ) if PTV close by /  MRP to specify | Dmax ≤ 40 Gy 2 |
| ***EQD2/3*** | ***Dmax ≤ 68 Gy***  ***V26.9Gy ≤ 5cc*** | ***Dmax ≤ 52 Gy*** | ***Dmax ≤ 57 Gy*** | ***Dmax ≤ 58 Gy*** | ***Dmax ≤ 51 Gy***  ***(Dmax ≤ 70 Gy)*** | ***Dmax ≤ 64 Gy*** |
| **Large Bowel**  **(Colon, Rectum)** | Dmax ≤ 18.4 Gy1 | Dmax ≤ 20 Gy12 | Dmax ≤ 28.2 Gy 1 | Dmax ≤ 34.5 Gy 1* | Dmax ≤ 38 Gy 1 | Dmax ≤ 46 Gy1 |
| ***EQD2/3*** | Dmax ***≤ 79 Gy*** | Dmax ***≤ 52 Gy*** | Dmax ***≤ 70 Gy*** | Dmax ***≤ 80 Gy*** | Dmax ***≤ 81 Gy*** | Dmax ***≤ 81 Gy*** |
| **Liver (Liver minus GTV)** | > 700 cc ≤ 9.1 Gy1 | > 700 cc ≤ 14 Gy1*  Mean ≤ 8 - 9 Gy12 | >700 cc ≤ 17.4 Gy31 | >700 cc ≤ 19 Gy 1* | > 700 cc ≤ 21 Gy1 | >700 cc ≤22 Gy2 |
| ***EQD2/3*** | ***>700 cc ≤ 22 Gy*** | ***>700 cc ≤ 28 Gy***  ***Mean ≤ 11-14 Gy*** | ***>700 cc ≤ 31 Gy )*** | ***>700 cc ≤ 29 Gy*** | ***>700 cc ≤ 30 Gy*** | ***>700 cc ≤ 25 Gy*** |
| **Central Biliary Tract** | Dmax ≤ 24 Gy29*,30* | Dmax ≤ 33 Gy29*,30* | Dmax ≤ 40 Gy29*,30* | Dmax ≤ 45 Gy29*,30* | Dmax ≤ 50 Gy29,30 | Dmax ≤ 61 Gy29*,30* |
| ***EQD2/3*** | ***Dmax ≤ 130 Gy*** | ***Dmax ≤ 129 Gy*** | ***Dmax ≤ 131 Gy*** | ***Dmax ≤ 128 Gy*** | ***Dmax ≤ 130 Gy*** | ***Dmax ≤ 130 Gy*** |
| **Renal Cortex (Kidneys)**  **(R & L combined)** | >200cc ≤ 8.4 Gy1 | >200cc ≤12.6 Gy1* | >200cc ≤ 14.4 Gy31 | >200cc ≤16.2 Gy1* | >200cc ≤17.5 Gy1 | >200cc ≤ 21 Gy2 |
| ***EQD2/3*** | ***>200cc ≤ 19 Gy*** | ***>200cc ≤ 23 Gy*** | ***>200cc ≤ 23 Gy*** | ***>200cc ≤ 23 Gy*** | ***>200cc ≤ 23 Gy*** | ***>200cc ≤ 24 Gy*** |
| **Bladder Wall** | Dmax ≤ 18.4 Gy1 | No Available Data. Dose Constraints at RO discretion. | Dmax ≤ 28.2 Gy1 | Dmax ≤ 34.5 Gy 1* | Dmax ≤ 38 Gy1 | No Available Data. Dose Constraints at RO discretion. |
| ***EQD2/3*** | ***Dmax ≤ 79 Gy*** | - | ***Dmax ≤ 70 Gy*** | ***Dmax ≤ 80 Gy*** | ***Dmax ≤ 81 Gy*** | - |
| **Penile Bulb** | Dmax ≤ 34 Gy1  V14Gy ≤ 3cc1 | No Available Data. Dose Constraints at RO discretion. | Dmax ≤ 42 Gy 1  V21.9 Gy ≤ 3 cc1 | No Available Data. Dose Constraints at RO discretion. | Dmax ≤ 50 Gy1  V30 Gy ≤ 3 cc1 | No Available Data. Dose Constraints at RO discretion. |
| ***EQD2/3*** | ***Dmax ≤ 252 Gy***  ***V48Gy ≤ 3cc*** | - | ***Dmax ≤ 143 Gy***  ***V45Gy ≤ 3 cc*** | - | ***Dmax ≤ 130 Gy***  ***V54Gy ≤ 3 cc*** | - |
| **Ureter** | Dmax ≤ 28.5 Gy24 | No Available Data. Dose Constraints at RO discretion. | No Available Data. Dose Constraints at RO discretion. | No Available Data. Dose Constraints at RO discretion. | No Available Data. Dose Constraints at RO discretion. | No Available Data. Dose Constraints at RO discretion. |
| ***EQD2/3*** | ***Dmax ≤ 180 Gy*** | - | - | - | - | - |
| **Femoral Heads (R & L combined)** | V14Gy ≤ 10cc1 | No Available Data. Dose Constraints at RO discretion. | V21.9Gy ≤ 10 cc1 | V27Gy ≤ 10 cc 1* | V30Gy ≤ 10 cc1 | No Available Data. Dose Constraints at RO discretion. |
| ***EQD2/3*** | ***V48Gy ≤ 10 cc*** | - | ***V45Gy ≤ 10 cc*** | ***V53Gy ≤ 10 cc*** | ***V54Gy ≤ 10 cc*** | - |
| **Cochlea** | Dmax ≤ 12 Gy18 | Dmax ≤ 16.5 Gy18 | Dmax ≤ 20 Gy18 | Dmax ≤ 22.5 Gy18 | Dmax ≤ 25.0 Gy18 | No Available Data. Dose Constraints at RO discretion. |
| ***EQD2/3*** | ***Dmax ≤ 36 Gy*** | ***Dmax ≤ 37 Gy*** | ***Dmax ≤ 39 Gy*** | ***Dmax ≤ 39 Gy*** | ***Dmax ≤ 39 Gy*** | - |
| **OAR** | **1** | **2** | **3** | **4** | **5** | **8** |
| **Brainstem**  **(not medulla)** | Dmax ≤ 15 Gy1 | No Available Data. Dose Constraints at RO discretion. | Dmax ≤ 23.1 Gy1 | Dmax ≤ 28 Gy1* | Dmax ≤ 31 Gy 1 | No Available Data. Dose Constraints at RO discretion. |
| ***EQD2/2*** | ***Dmax ≤ 64 Gy*** | - | ***Dmax ≤ 56 Gy*** | ***Dmax ≤ 63 Gy*** | ***Dmax ≤ 63 Gy*** | - |
| **Optic Pathway** | Dmax ≤ 12 Gy17 | Dmax ≤ 15.8 Gy17 | Dmax ≤ 19.5 Gy17 | Dmax ≤ 22.5 Gy17 | Dmax ≤ 25 Gy17 | No Available Data. Dose Constraints at RO discretion. |
| ***EQD2/2*** | ***Dmax ≤ 42 Gy*** | ***Dmax ≤ 39 Gy*** | ***Dmax ≤ 41 Gy*** | ***Dmax ≤ 43 Gy*** | ***Dmax ≤ 44 Gy*** | - |

**Appendix 2: Reasonable reirradiation SBRT doses to the thecal sac Pmax following common initial conventional radiotherapy regimens**


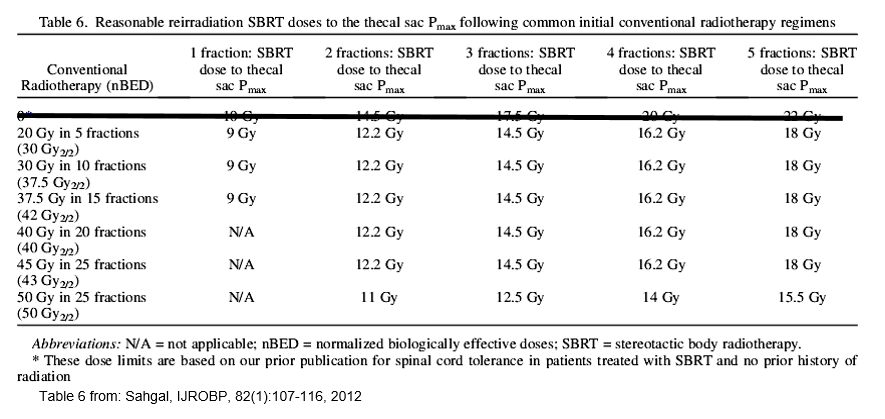


*Table 2 taken from Table 6 of: Sahgal A et al. Reirradiation human spinal cord tolerance for stereotactic body radiotherapy. Int J Radiat Oncol Biol Phys. 2012 Jan 1;82(1):107-16. doi: 10.1016/j.ijrobp.2010.08.021.

1 Benedict SH et al., AAPM TG101, Med.Phys 37(9), 2010 (NB: max pt = 0.035cc). DOI: (10.1118/1.3438081)
2 Palma et al., SABR-COMET Trial,, v.1.9, Apr 2015 | The Lancet, 393(10185), 2051-2058 (Appendix). DOI: ( 10.1016/S0140-6736(18)32487-5)
3 Videtic et al., RTOG 0915, IJROBP, 93(4) : 757-764, 2015. Supplementary Table E2 DOI: ([10.1016/j.ijrobp.2015.07.2260](https://doi.org/10.1016/j.ijrobp.2015.07.2260))

4 Forquer JA et al., Radiother Onc, 93:408-413, 2009. DOI: (10.1016/j.radonc.2009.04.018)

5 Karlsson K et al., IJROBP, 87(3): 590-595, 2013. DOI: (10.1016/j.ijrobp.2013.06.2055)

6 Dunlap NE et al., IJROBP 76(3): 796-801, 2010. DOI : ( 10.1016/j.ijrobp.2009.02.027)

7 Andolino DL et al., IJROBP 80(3): 692-697, 2011. DOI: (10.1016/j.ijrobp.2010.03.020)

8 Baker R, IJROBP, 85(1):190-195, 2013. DOI:(10.1016/j.ijrobp.2012.03.041)
9 Matsuo Yet al., IJROBP, 83(4): e545-549, 2012. DOI: (10.1016/j.ijrobp.2012.01.018)
10 Bongers EM et al., Radiother Onc, 10991): 95-99, 2013. (DOI: [10.1016/j.radonc.2013.10.011](https://doi.org/10.1016/j.radonc.2013.10.011))
11 Sahgal A et al., IJROBP, 82(1):107-116, 2012. DOI: (10.1016/j.ijrobp.2010.08.021)
12 Sahgal et al.,NCIC CTG Protocol #SC.24. Feb 2, 2017| The Lancet, 22(7), 1023-1033, 2021. .DOI:(10.1016/S1470-2045(21)00196-0), Supplimental

13 Sahgal A et al., IJROBP, 85(2):341-7, 2013 ( Table 5; using 5% risk as per Sahgal ; personal communication Feb 2017 )

14 Ma, RMK et al, BC Cancer, Provincial Protocol Guidelines for SABR: Hepatocellular Cancer, Version June 27, 2018.

15 Velec M, et al, IJROBP, 97(5), 939-946, 2017, DOI: (10.1016/j.ijrobp.2017.01.221)
16 Grimm, et al, JACMP, 12(2), 267-292, 2011. DOI: ([10.1120/jacmp.v12i2.3368](https://doi.org/10.1120/jacmp.v12i2.3368))

17 Hiniker, et al., Sem Radiat Oncol 26(2), 97-104, 2016. DOI: (10.1016/j.semradonc.2015.11.008)

18 Rashid, et al., Sem Radiati Oncol 26(2) 105-111, 2016. DOI: (10.1016/j.semradonc.2015.11.004)

19 Kimsey et al., Sem Radiat Oncol 26(2), 129-134, 2016. DOI: (10.1016/j.semradonc.2015.11.003)

20 Xue et al, Sem Radiat Oncol 26(2), 135-139, 2016. DOI: (10.1016/j.semradonc.2015.11.001)

21 Nuyttens et al., Sem Radiat Oncol 26(2), 120-128, 2016. DOI: (10.1016/j.semradonc.2015.11.006)
22 Goldsmith et al., Sem Radiat Oncol 26(2), 149-156, 2016. DOI: (10.1016/j.semradonc.2015.12.002)

23 LaCouture et al., Sem Radiat Oncol 26(2), 157-164, 2016. DOI: ([10.1016/j.semradonc.2015.11.009](https://doi.org/10.1016/j.semradonc.2015.11.009))

24 Palma et al,SABR-COMET-10, v.2.1,13Oct2021 |BMC Cancer,19,816, 2019. DOI:(10.1186/s12885-019-5977-6)**NOTE :2021 Protocol Update supersedes BMC Cancer**

25 Sahgal et al., IJROPB, 110(1), 124-136, 2021. HYTEC - DOI : ([10.1016/j.ijrobp.2019.09.038](https://doi.org/10.1016/j.ijrobp.2019.09.038))

26 Liu M et al., BC Cancer Provincial Protocol Guidelines for SABR : Lung, Version May 2021

27 Kong et al., IJROBP, 110(1), 172-187, 2021. DOI : (10.1016/j.ijrobp.2018.11.028)

28Ling et al., J Radiosurg SBRT, 6, 83-89, 2019. PMID: 31641545 PMCID: PMC6774490

29Eriguchi et al.,IJROBP, 85(4). 1006e1011, 2013. DOI: 10.1016/j.ijrobp.2012.09.012

30 Diez P, et al. Clinical Oncology 34, 288-300, 2022. DOI: ([10.1016/j.clon.2022.02.010](https://doi.org/10.1016/j.clon.2022.02.010))*Modified

31 Moiseenko V, et al. Erratum AAPM TG101, Med Phys, online ahead of print, 2023. DOI: (10.1002/mp.16159)
